# Supplementary material for: Chemodosimeter for CN− – interplay between experiment and theory
Source: Royal Society of Chemistry journal article supplement (doi:10.1039/c2dt30854a), 2012-01-01
Supplement: c2dt30854a.pdf [file c2dt30854a.pdf]

## SUPPLEMENTARY INFORMATION (SI)

### Chemodosimeter for CN<sup>-</sup> -Interplay between experiment and theory

Paramjit Kaur\* and Divya Sareen

*Department of Chemistry, UGC-Centre of Advance Studies-I, Guru Nanak Dev  
University, Amritsar-143 005, India*

#### S1. Experimental

##### 1. General

Mass spectra were recorded on UPLC-Q-TOF mass spectrometer. <sup>1</sup>H NMR and <sup>13</sup>C NMR spectra have been recorded on JEOL-FT NMR-AL at 300 and 75 MHz, respectively, with TMS as internal standard using both CDCl<sub>3</sub> and CD<sub>3</sub>CN as deuterated solvents. Data are reported as follows: chemical shift in ppm (δ), integration, multiplicity (s=singlet, d=doublet, t=triplet, q=quartet), coupling constant J (Hz) and assignment. The purity of the solid products was checked by elemental analysis performed on Thermoelectron FLASH EA1112, CHNS analyser. UV-visible spectral studies were conducted on Shimadzu 1601 PC spectrophotometer with a quartz cuvette (path length, 1cm). The absorption spectra have been recorded between 1100 and 200 nm. The cell holder of the spectrophotometer was thermostatted at 25°C for consistency in the recordings. The pH titrations have been performed with the Equip-Tronics Digital pH meter model-EQ 610. The electrochemical behaviour was determined by cyclic voltammetry on a CHI 660C Electrochemical Workstation with a conventional three-electrode configuration consisting of a platinum working (2 mm diameter) and counter electrodes and Ag/AgCl as the reference electrode. The experiments were carried out in 10<sup>-3</sup> M solutions of samples in acetonitrile containing 0.1 M sodium perchlorate as supporting electrolyte at room temperature. Deoxygenation of the solutions was achieved by bubbling nitrogen for 10 min and the working electrode was cleaned after each run. The voltammograms were recorded with a scan rate of 100 mVs<sup>-1</sup>.

##### 2. Computational Methods

All theoretical calculations were carried out by using the Gaussian 09 suite of programs. The molecular geometries of **1** and **1**+CN<sup>-</sup> were optimized by

DFT/B3LYP/6-311G\* method. Energy values and properties of the systems were computed at the same level and considering solvent (acetonitrile) effects by using the Cossi and Barone's CPCM (conductor-like polarizable continuum model) modification<sup>2</sup> of the Tomasi's PCM formalism.<sup>3</sup> The first 20 excited states were calculated by using time-dependent density functional theory (TD-DFT) calculations. The molecular orbital contours were plotted using Gauss view 5.0.9.

### 3. Chemicals

Anions used in the spectrophotometric studies were added as sodium salts of analytical grade. The solvents used were also of analytical grade purchased from Thomas Baker.

### 4. Synthetic Procedure for 1<sup>4</sup>

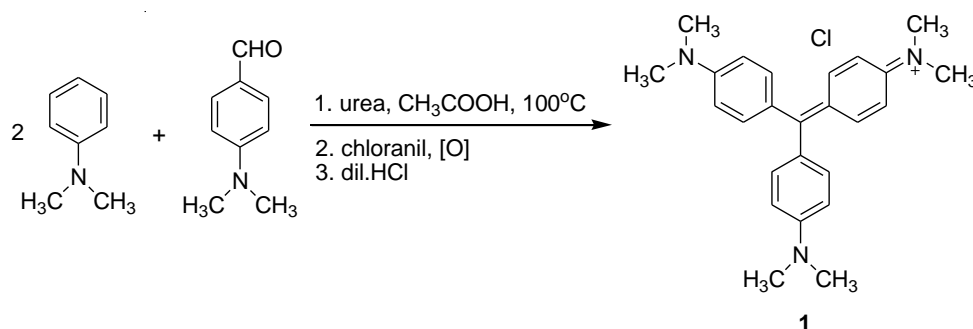

#### Scheme S1. Preparation of compound 1.

N,N-dimethylaniline (72.6g, 0.60 mol), urea (10g, 0.17 mol) and 4-dimethylamino-benzaldehyde (44.76g, 0.30 mol) in 600ml of glacial acetic acid were heated to 100°C under nitrogen for 8 hours. Thereafter, the reaction mixture was cooled. 6g of chloranil was added and the mixture was subjected to vigorous gassing with air at 50°C for 12 hours along with uniform addition of 2.5g of sodium nitrite. Afterwards, some of the glacial acetic acid was evaporated off in vacuo and the residue was taken up in hot water. The aqueous mixture was then acidified with dilute hydrochloric acid whereupon precipitation occurred. The solution was filtered hot to obtain the dye. The dye obtained was purified by column chromatography with silica

<sup>1</sup> L. J. Bartolotti and K. Fluchick, in *Reviews in Computational Chemistry*, ed. K. B. Lipkowitz and B. D. Boyd, VCH, New York, 1996, **7**, 187-216.

<sup>2</sup> (a) V. Barone and M. Cossi, *J. Phys. Chem. A*, 1998, **102**, 1995-2001; (b) M. Cossi, N. Rega, G. Scalmani and V. Barone, *J. Comp. Chem.*, 2003, **24**, 669-681.

<sup>3</sup> (a) S. Miertus, E. Scrocco and J. Tomasi, *Chem. Phys.*, 1981, **55**, 117-129; (b) R. Cammi, B. Mennucci and J. Tomasi, *J. Phys. Chem. A*, 2000, **104**, 5631-5637.

<sup>4</sup> K. H. Hermann, *US Pat.*, 4 330 476, 1982.

gel G (100-200 mesh) using 50% methanol/ ethyl acetate as eluent. Yield: 80%. Found: C, 73.70; H, 7.41; N, 10.39. Calc. for  $C_{25}H_{30}N_3Cl$ : C, 73.62; H, 7.36; N, 10.31%.  $^1H$  NMR (300 MHz;  $CDCl_3$ ;  $Me_4Si$ ; ppm)  $\delta_H$ : 3.28 (18H, s,  $-CH_3$ ), 6.86 (6H, d,  $J=9$  Hz, aromatic  $H$ ), 7.32 (6H, d,  $J=9$  Hz, aromatic  $H$ ).  $^{13}C$  NMR (75 MHz;  $CDCl_3$ ;  $Me_4Si$ ; ppm)  $\delta_C$ : 40.56, 112.36, 126.65, 139.74, 155.58.  $m/z$  (EI): 372.6 ( $M^+ - Cl^- + 1$ ).

## 5. Synthetic Procedure for 2

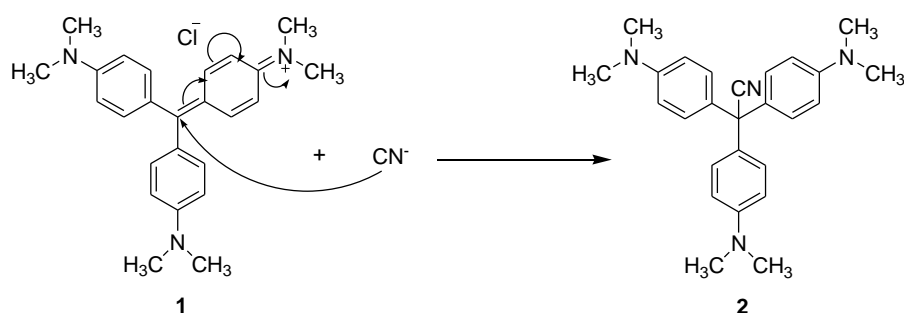

**Scheme S2.** Preparation of compound 2 from 1.

The cyanide adduct was obtained by taking 1 (1.0g, 2.45mmol) in acetonitrile and adding NaCN (0.150g, 3.0mmol) dissolved in minimum amount of water, to it. The reaction mixture was stirred at room temperature for 24 hours. White precipitates of adduct were formed which were obtained upon filtration. The precipitates were given charcoal treatment and recrystallized from dichloromethane to give the product. Yield: 85%. Found: C, 78.48; H, 7.61; N, 14.16. Calc. for  $C_{26}H_{30}N_4$ : C, 78.39; H, 7.54; N, 14.07%.  $^1H$  NMR (300 MHz;  $CDCl_3$ ;  $Me_4Si$ ; ppm)  $\delta_H$ : 2.94 (18H, s,  $-CH_3$ ), 6.64 (6H, d,  $J=9$  Hz, aromatic  $H$ ), 7.06 (6H, d,  $J=9$  Hz, aromatic  $H$ ).  $^{13}C$  NMR (75 MHz;  $CDCl_3$ ;  $Me_4Si$ ; ppm)  $\delta_C$ : 40.41, 55.08, 111.98, 129.17, 129.42, 149.69.  $m/z$  (EI): 399.7 ( $M^+ + 1$ ).

## 6. Spectral data for 1 and 2

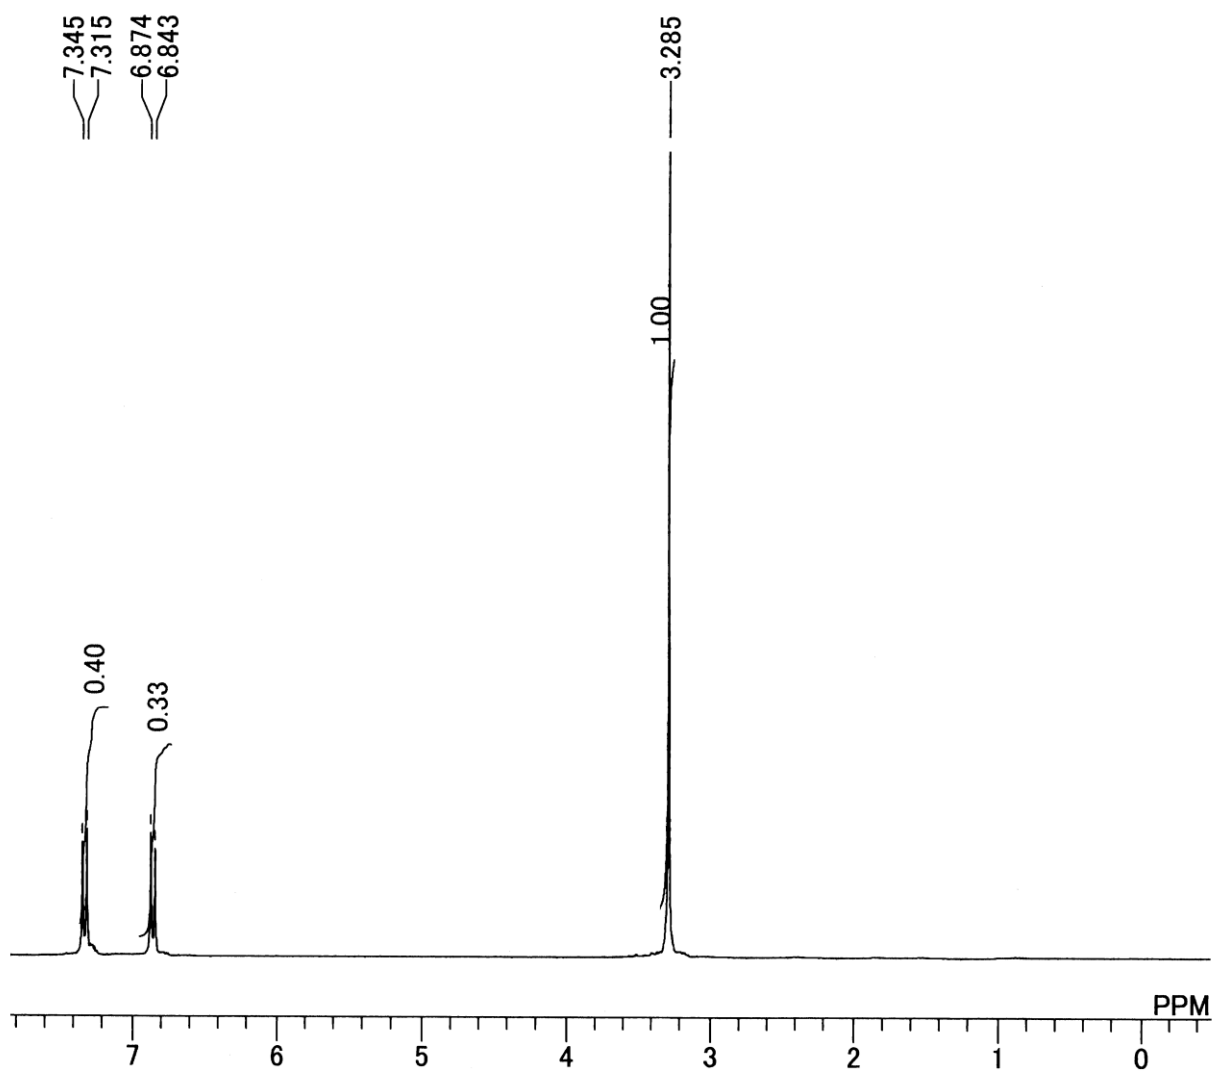

(a)  $^1\text{H}$  NMR spectrum of **1** (in  $\text{CDCl}_3$ )

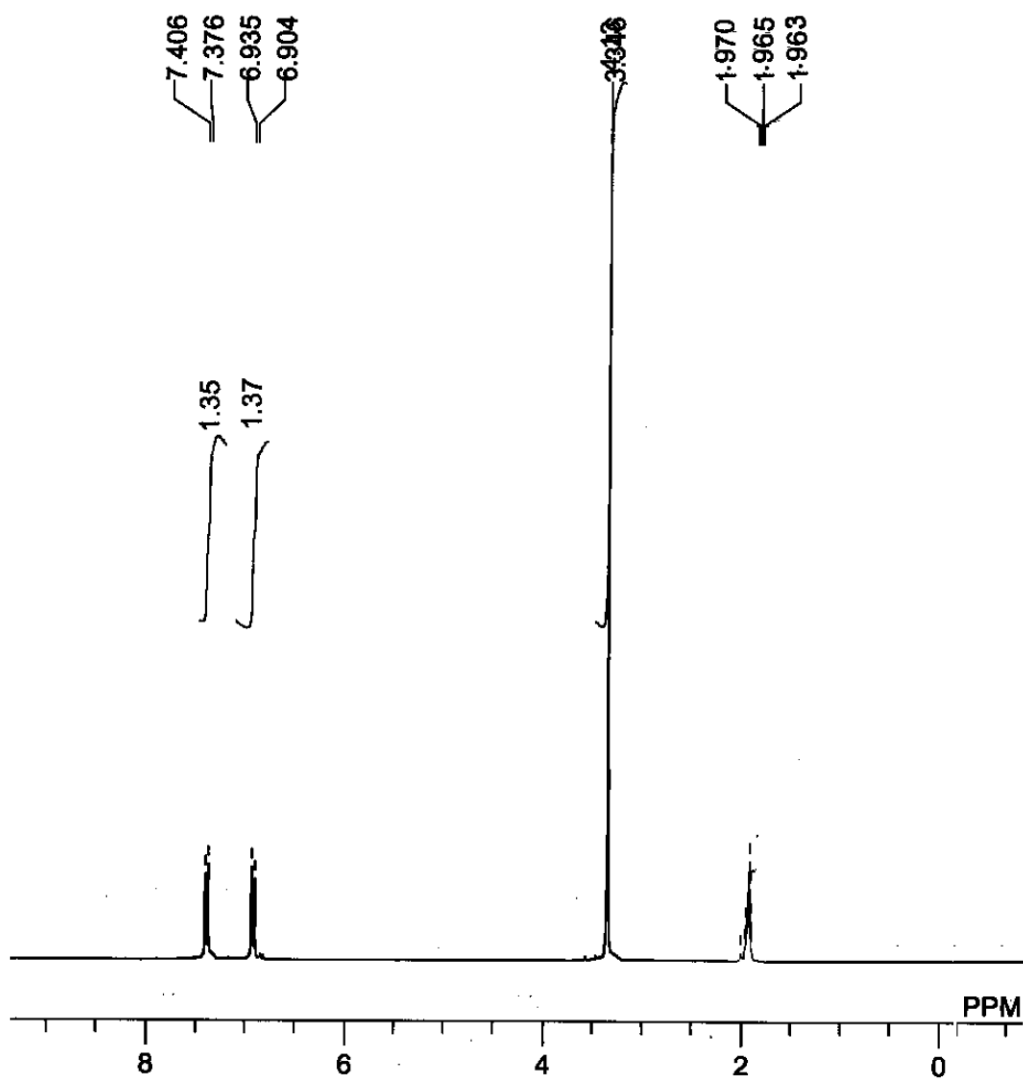

(b)  $^1\text{H}$  NMR spectrum of **1** (in  $\text{CD}_3\text{CN}$ )

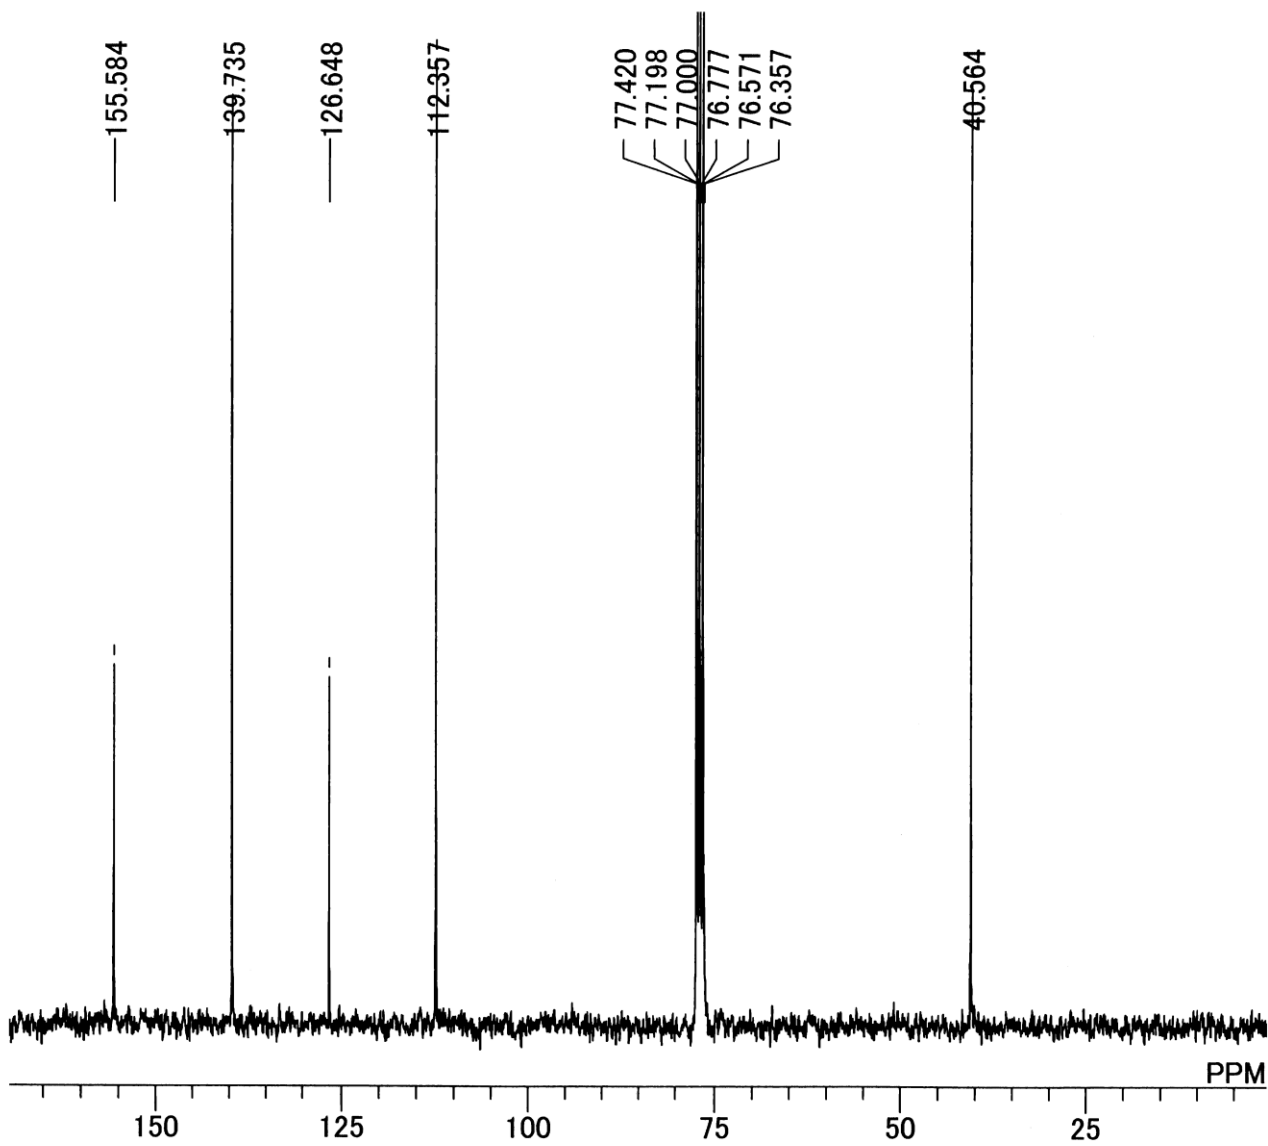

(c)  $^{13}\text{C}$  NMR spectrum of **1** (in  $\text{CDCl}_3$ )

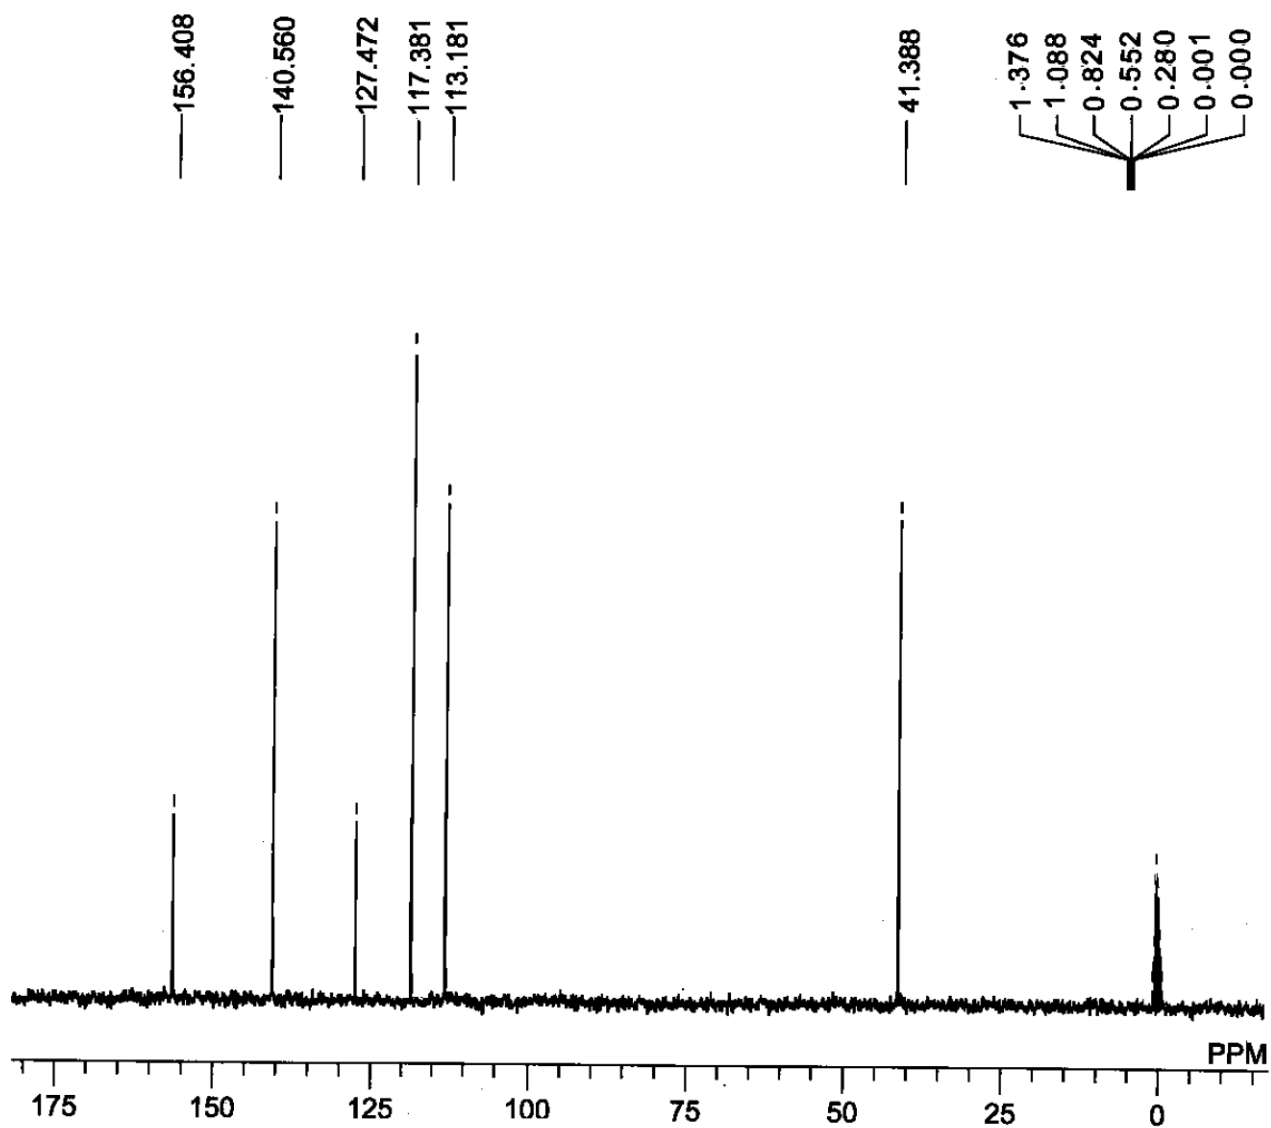

(d)  $^{13}\text{C}$  NMR spectrum of **1** (in  $\text{CD}_3\text{CN}$ )

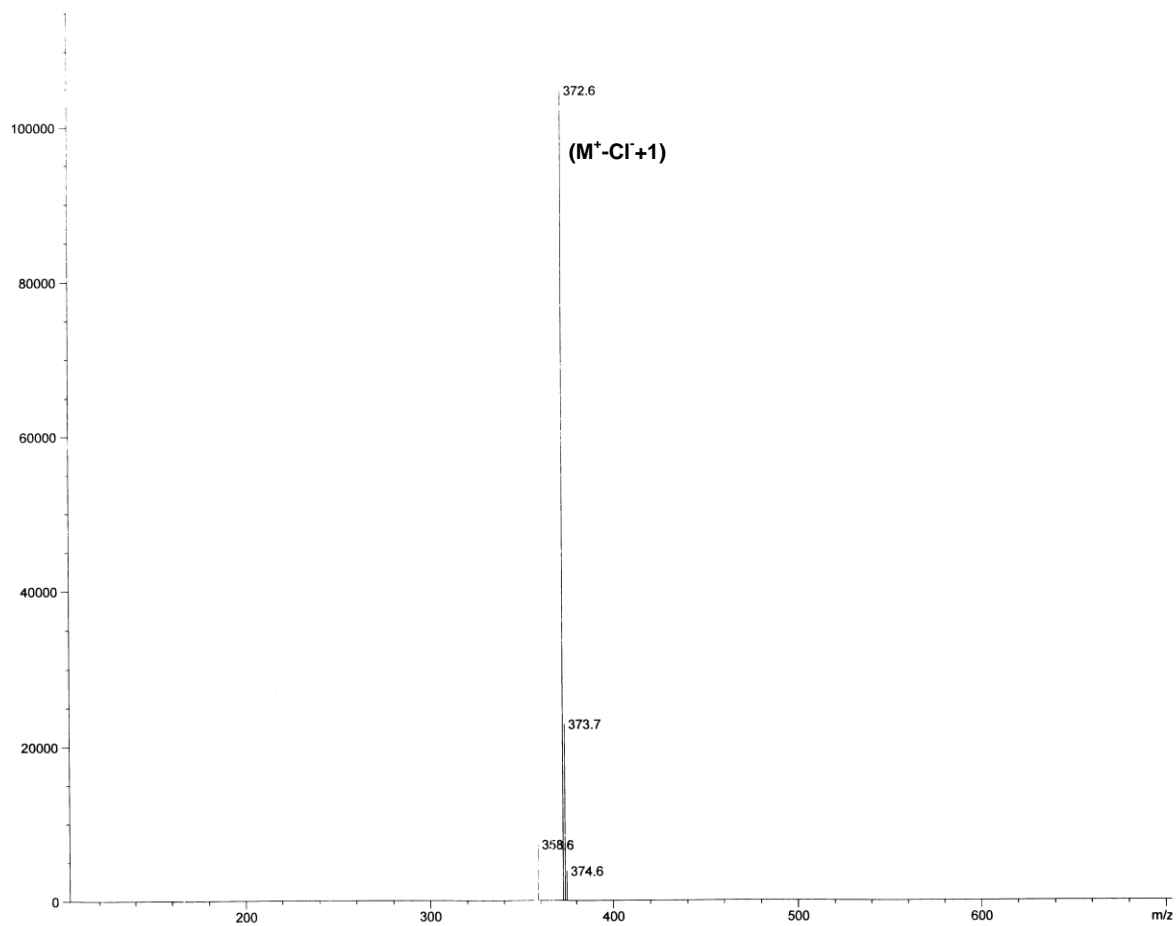

(e) Mass spectrum of **1**



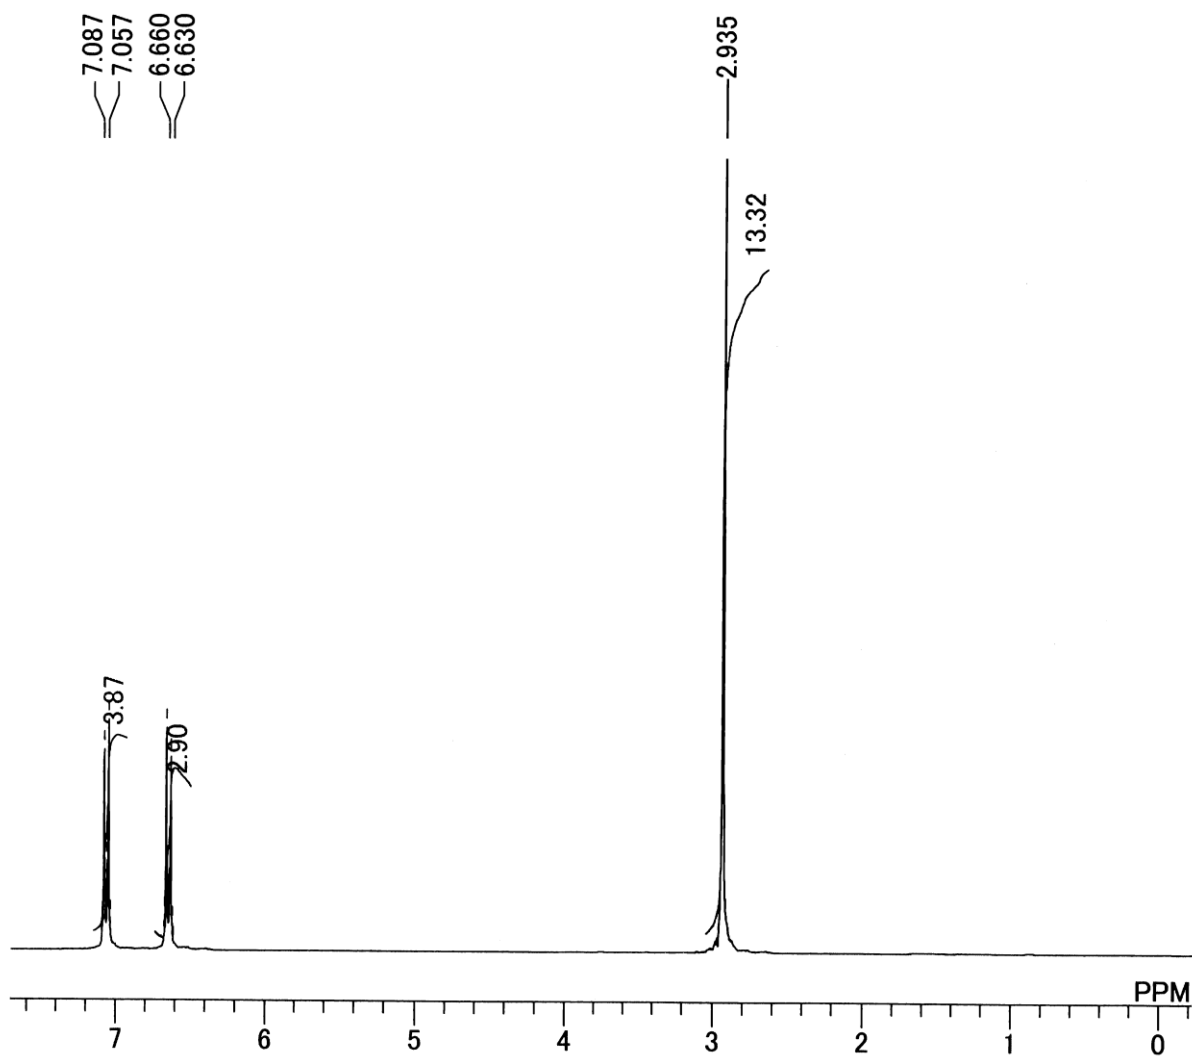

(f)  $^1\text{H}$  NMR spectrum of **2** (in  $\text{CDCl}_3$ )

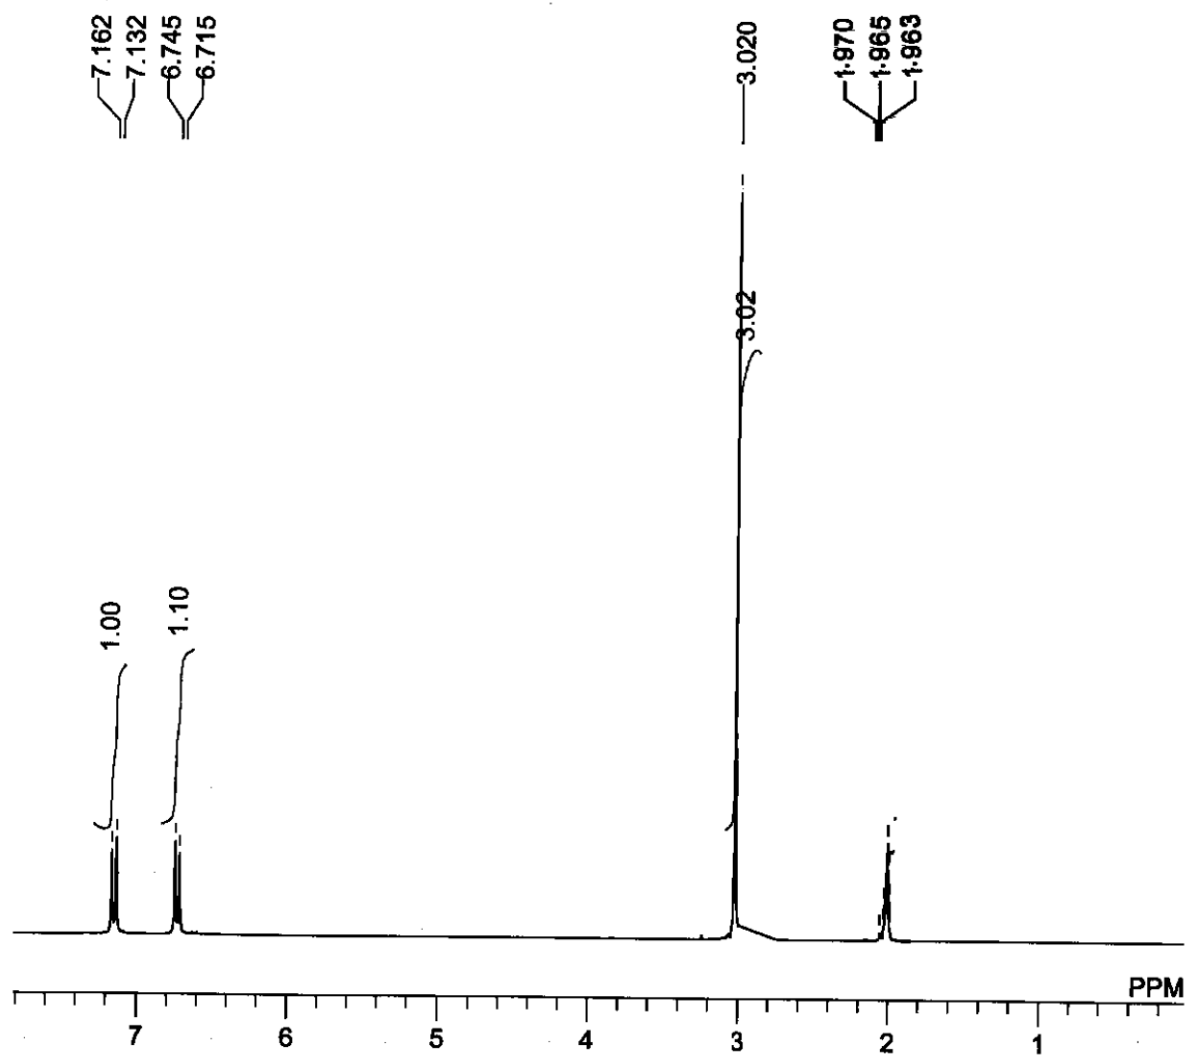

(g)  $^1\text{H}$  NMR spectrum of 2 (in  $\text{CD}_3\text{CN}$ )

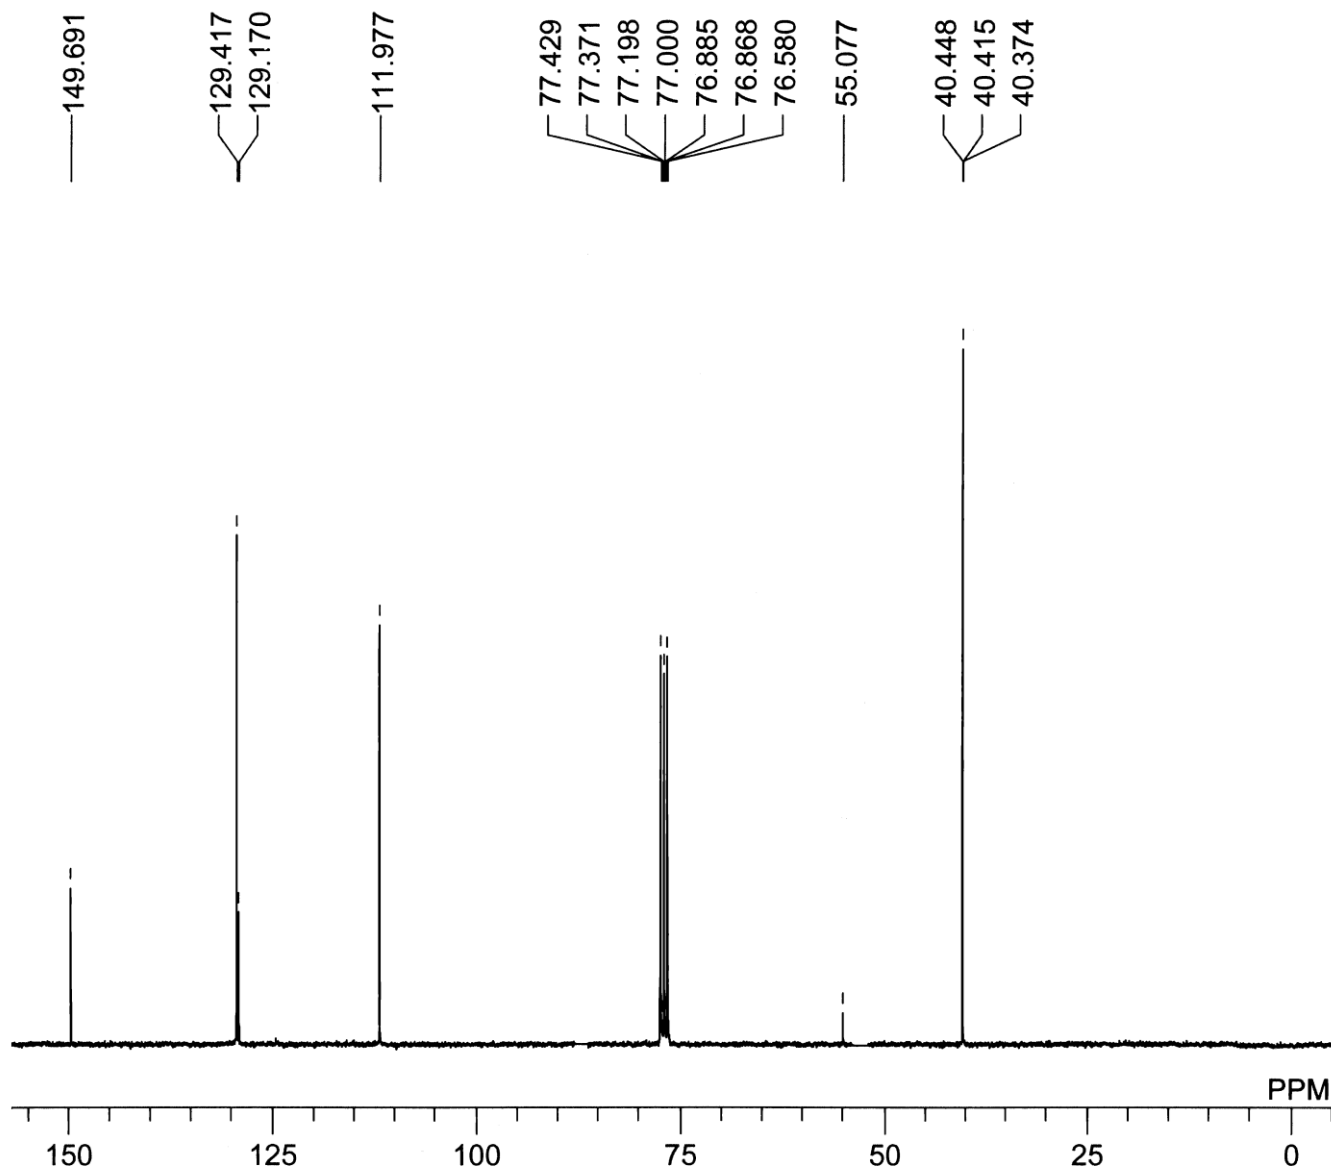

(h)  $^{13}\text{C}$  NMR spectrum of **2** (in  $\text{CDCl}_3$ )

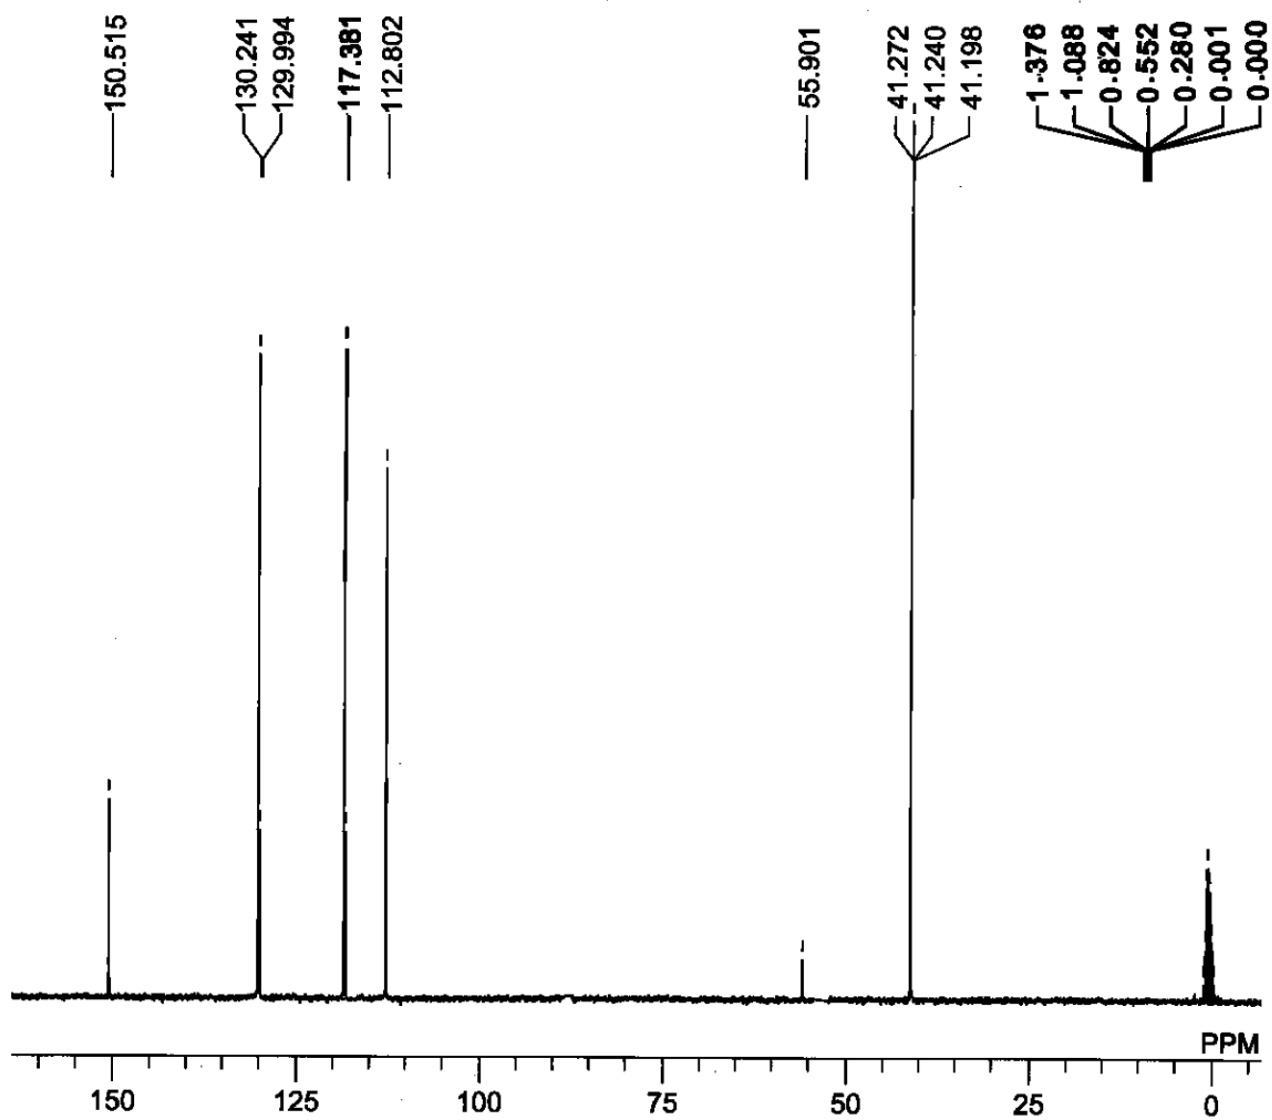

(i)  $^{13}\text{C}$  NMR spectrum of **2** (in  $\text{CD}_3\text{CN}$ )

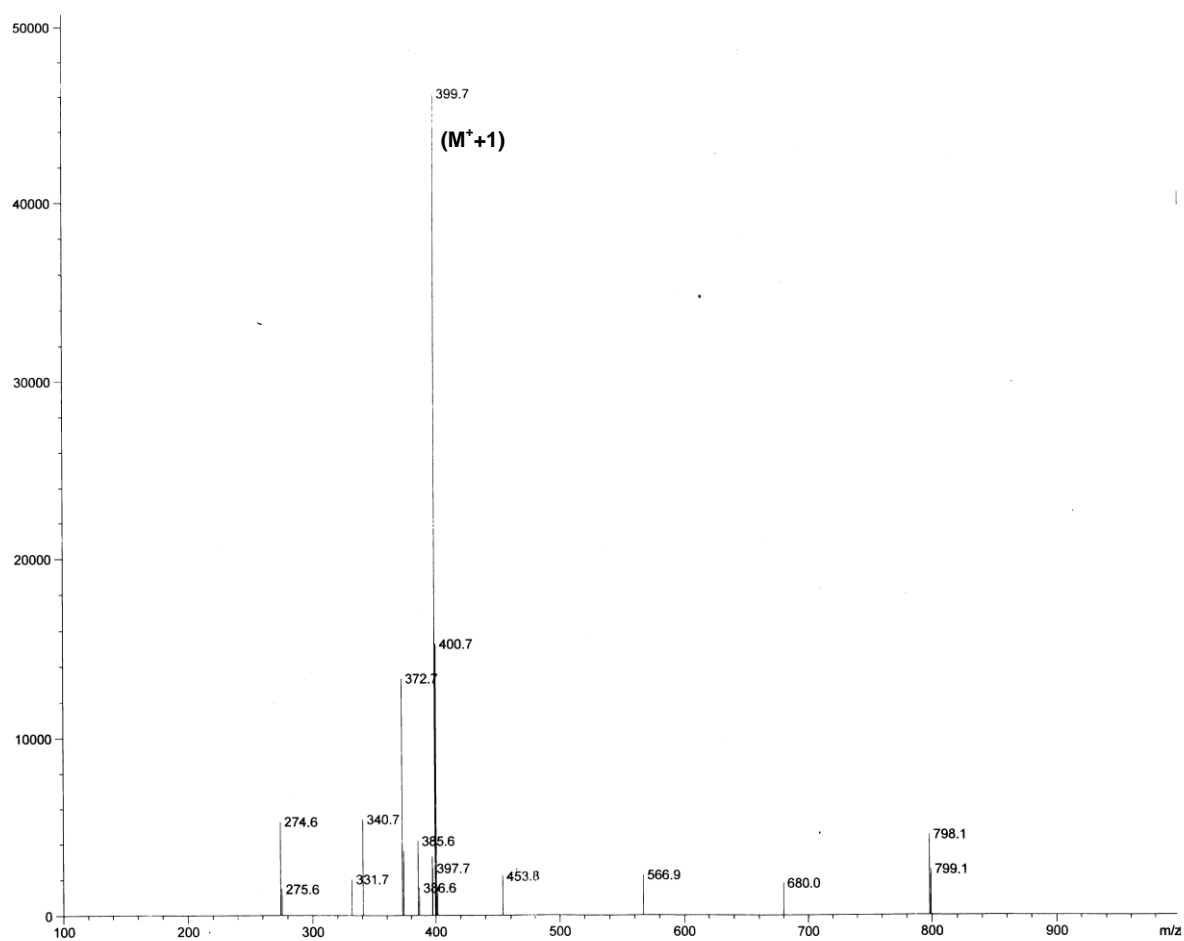

(j) Mass spectrum of 2

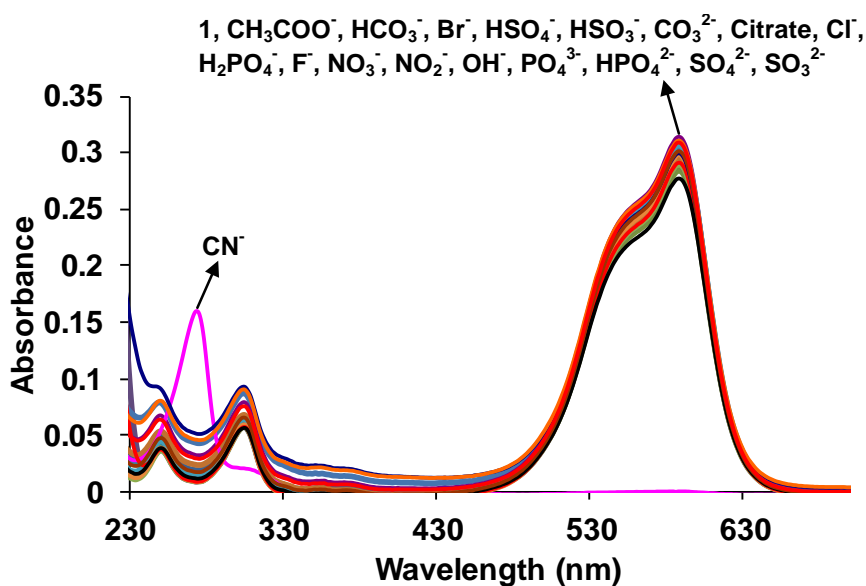

**Fig. S2.** Changes in the UV-vis spectrum of **1** ( $3 \times 10^{-6}$  M, in  $\text{CH}_3\text{CN}$ ) upon addition of different anions ( $3 \times 10^{-5}$  M, in HEPES buffered  $\text{H}_2\text{O}$ ).

**Table S3. (a)** Selected data of electronic transitions in **1** by TD-DFT method at the B3LYP/6-311G\* level.<sup>[a][b]</sup>

| State | $\lambda$ [nm (eV)] | f      | Composition of band and CI coefficients                                                |
|-------|---------------------|--------|----------------------------------------------------------------------------------------|
| 1     | 522.11 (2.37)       | 0.7273 | H→L, 0.70                                                                              |
| 2     | 503.24 (2.46)       | 0.7506 | H-1→L, 0.70                                                                            |
| 14    | 270.49 (4.58)       | 0.1733 | H-1→L+2, 0.63; H→L+3, 0.17; H-1→L+3, 0.12; H-10→L, 0.11; H→L+2, -0.10; H-1→L+4, -0.13; |
| 15    | 263.53 (4.70)       | 0.0909 | H→L+4, 0.58; H-1→L+4, 0.12; H→L+3, -0.10; H-9→L, -0.21; H-1→L+3, -0.25                 |

[a] Calculations were carried out for the lowest 20 excited states, and only energies above 250 nm with  $f > 0.09$  are shown. [b] f = oscillator strength; CI = configuration interaction; H = HOMO; L = LUMO.

**(b)** Cartesian coordinates from the optimized structure of **1** at B3LYP/6-311G\*.

E = -1595.4109 a.u.

| Center Number | Atomic Number | Atomic Type | Coordinates (Angstroms) |           |           |
|---------------|---------------|-------------|-------------------------|-----------|-----------|
|               |               |             | X                       | Y         | Z         |
| 1             | 6             | 0           | 1.560181                | -1.124209 | -1.119839 |
| 2             | 6             | 0           | 0.300841                | -1.205580 | -0.462150 |
| 3             | 6             | 0           | -0.007526               | -2.447669 | 0.161970  |
| 4             | 6             | 0           | 0.920518                | -3.454783 | 0.258834  |
| 5             | 6             | 0           | 2.237939                | -3.287125 | -0.265771 |
| 6             | 6             | 0           | 2.490340                | -2.118522 | -1.037871 |

|    |   |   |           |           |           |
|----|---|---|-----------|-----------|-----------|
| 7  | 1 | 0 | 1.804615  | -0.233775 | -1.684382 |
| 8  | 1 | 0 | -0.957527 | -2.562548 | 0.670911  |
| 9  | 1 | 0 | 0.671112  | -4.336988 | 0.833804  |
| 10 | 1 | 0 | 3.449391  | -1.974994 | -1.511066 |
| 11 | 6 | 0 | -0.520540 | -0.049976 | -0.286434 |
| 12 | 6 | 0 | -1.966368 | -0.184500 | -0.149265 |
| 13 | 6 | 0 | -2.687617 | -1.146423 | -0.887325 |
| 14 | 6 | 0 | -2.714967 | 0.628359  | 0.727740  |
| 15 | 6 | 0 | -4.057476 | -1.283165 | -0.774552 |
| 16 | 1 | 0 | -2.154806 | -1.773879 | -1.593061 |
| 17 | 6 | 0 | -4.081953 | 0.490765  | 0.868130  |
| 18 | 1 | 0 | -2.197376 | 1.356147  | 1.342095  |
| 19 | 6 | 0 | -4.803674 | -0.467252 | 0.112295  |
| 20 | 1 | 0 | -4.555233 | -2.021375 | -1.389508 |
| 21 | 1 | 0 | -4.593413 | 1.122858  | 1.582093  |
| 22 | 6 | 0 | 0.104611  | 1.247437  | -0.198218 |
| 23 | 6 | 0 | -0.555032 | 2.435815  | -0.605290 |
| 24 | 6 | 0 | 1.431117  | 1.393374  | 0.294966  |
| 25 | 6 | 0 | 0.064207  | 3.664374  | -0.558695 |
| 26 | 6 | 0 | 2.054055  | 2.616090  | 0.357110  |
| 27 | 1 | 0 | 2.000186  | 0.544024  | 0.661013  |
| 28 | 6 | 0 | 1.398746  | 3.795896  | -0.077543 |
| 29 | 7 | 0 | 3.225571  | -4.181977 | -0.031349 |
| 30 | 6 | 0 | 4.627082  | -3.813888 | -0.275513 |
| 31 | 1 | 0 | 4.809409  | -2.778244 | 0.032064  |
| 32 | 1 | 0 | 4.894625  | -3.940853 | -1.330819 |
| 33 | 6 | 0 | 2.956840  | -5.430769 | 0.665981  |
| 34 | 1 | 0 | 3.808642  | -6.096625 | 0.539431  |
| 35 | 1 | 0 | 2.080082  | -5.932126 | 0.250304  |
| 36 | 7 | 0 | -6.163961 | -0.598034 | 0.232793  |
| 37 | 6 | 0 | -6.904979 | 0.254666  | 1.148629  |
| 38 | 1 | 0 | -6.604100 | 0.098214  | 2.191387  |
| 39 | 1 | 0 | -7.966543 | 0.029709  | 1.069558  |
| 40 | 6 | 0 | -6.870214 | -1.627750 | -0.512873 |
| 41 | 1 | 0 | -6.507704 | -2.631924 | -0.265068 |
| 42 | 1 | 0 | -6.770733 | -1.487028 | -1.595053 |
| 43 | 1 | 0 | -0.472661 | 4.529732  | -0.925124 |
| 44 | 1 | 0 | 3.063717  | 2.630180  | 0.746505  |
| 45 | 1 | 0 | -1.555586 | 2.372814  | -1.018315 |
| 46 | 1 | 0 | -7.929614 | -1.585567 | -0.268733 |
| 47 | 1 | 0 | -6.770002 | 1.315090  | 0.910453  |
| 48 | 1 | 0 | 2.796641  | -5.276999 | 1.740384  |
| 49 | 1 | 0 | 5.265544  | -4.465241 | 0.319568  |
| 50 | 7 | 0 | 2.025124  | 5.007806  | -0.037898 |
| 51 | 6 | 0 | 1.324261  | 6.217849  | -0.438310 |
| 52 | 6 | 0 | 3.414754  | 5.099741  | 0.401485  |
| 53 | 1 | 0 | 0.416097  | 6.373264  | 0.153781  |
| 54 | 1 | 0 | 1.973570  | 7.076601  | -0.282644 |
| 55 | 1 | 0 | 1.042519  | 6.196323  | -1.497529 |
| 56 | 1 | 0 | 3.758833  | 6.125055  | 0.282553  |

|    |    |   |          |           |           |
|----|----|---|----------|-----------|-----------|
| 57 | 1  | 0 | 3.525928 | 4.819775  | 1.453971  |
| 58 | 1  | 0 | 4.064514 | 4.450544  | -0.191159 |
| 59 | 17 | 0 | 4.571286 | -0.279603 | 0.796637  |

(c) Selected data of electronic transitions in  $\mathbf{1}+\text{CN}^-$  by TD-DFT method at the B3LYP/6-311G\* level.<sup>[a][b]</sup>

| State | $\lambda$ [nm (eV)] | f      | Composition of band and CI coefficients              |
|-------|---------------------|--------|------------------------------------------------------|
| 4     | 275.70 (4.50)       | 0.1616 | H→L+1, 0.64; H→L+2, 0.17; H-1→L, 0.12                |
| 5     | 275.03 (4.51)       | 0.1847 | H→L+2, 0.64; H→L+3, -0.11; H-2→L, 0.12; H→L+1, -0.17 |

[a] Calculations were carried out for the lowest 15 excited states, and only energies above 250 nm with  $f > 0.15$  are shown. [b]  $f$  = oscillator strength; CI = configuration interaction; H = HOMO; L = LUMO.

(d) Cartesian coordinates from the optimized structure of  $\mathbf{1}+\text{CN}^-$  at B3LYP/6-311G\*.

E= -1228.0491 a.u.

| Center Number | Atomic Number | Atomic Type | Coordinates (Angstroms) |           |           |
|---------------|---------------|-------------|-------------------------|-----------|-----------|
|               |               |             | X                       | Y         | Z         |
| 1             | 6             | 0           | 0.747507                | 2.417645  | 1.269256  |
| 2             | 6             | 0           | -0.039998               | 1.455584  | 0.629385  |
| 3             | 6             | 0           | -0.806702               | 1.879023  | -0.455914 |
| 4             | 6             | 0           | -0.795240               | 3.201389  | -0.887717 |
| 5             | 6             | 0           | -0.018392               | 4.179053  | -0.233426 |
| 6             | 6             | 0           | 0.766772                | 3.741550  | 0.855970  |
| 7             | 1             | 0           | 1.364009                | 2.132436  | 2.115680  |
| 8             | 1             | 0           | -1.431831               | 1.169426  | -0.984964 |
| 9             | 1             | 0           | -1.409431               | 3.465150  | -1.738808 |
| 10            | 1             | 0           | 1.396792                | 4.436884  | 1.394951  |
| 11            | 6             | 0           | 0.002799                | -0.025801 | 1.077234  |
| 12            | 6             | 0           | -1.265882               | -0.788705 | 0.623579  |
| 13            | 6             | 0           | -2.484462               | -0.600364 | 1.282586  |
| 14            | 6             | 0           | -1.264581               | -1.632888 | -0.486306 |
| 15            | 6             | 0           | -3.647920               | -1.228425 | 0.863613  |
| 16            | 1             | 0           | -2.532932               | 0.052334  | 2.148378  |
| 17            | 6             | 0           | -2.423527               | -2.265494 | -0.924774 |
| 18            | 1             | 0           | -0.343739               | -1.807204 | -1.030273 |
| 19            | 6             | 0           | -3.650677               | -2.094159 | -0.252311 |
| 20            | 1             | 0           | -4.558168               | -1.041717 | 1.418113  |
| 21            | 1             | 0           | -2.357667               | -2.903567 | -1.796436 |
| 22            | 6             | 0           | 1.291098                | -0.733457 | 0.589002  |
| 23            | 6             | 0           | 1.703361                | -1.933809 | 1.176719  |
| 24            | 6             | 0           | 2.058588                | -0.243458 | -0.466579 |
| 25            | 6             | 0           | 2.823213                | -2.619807 | 0.732482  |
| 26            | 6             | 0           | 3.183694                | -0.920592 | -0.927746 |
| 27            | 1             | 0           | 1.786371                | 0.690782  | -0.943052 |
| 28            | 6             | 0           | 3.594482                | -2.138204 | -0.348816 |



|    |   |   |           |           |           |
|----|---|---|-----------|-----------|-----------|
| 29 | 7 | 0 | -0.035549 | 5.509503  | -0.628879 |
| 30 | 6 | 0 | 0.943842  | 6.429255  | -0.078228 |
| 31 | 1 | 0 | 1.980111  | 6.145927  | -0.315050 |
| 32 | 1 | 0 | 0.853484  | 6.497565  | 1.009458  |
| 33 | 6 | 0 | -0.679708 | 5.870705  | -1.878482 |
| 34 | 1 | 0 | -0.618982 | 6.949743  | -2.014379 |
| 35 | 1 | 0 | -1.740539 | 5.604494  | -1.866609 |
| 36 | 7 | 0 | -4.803281 | -2.754921 | -0.656207 |
| 37 | 6 | 0 | -4.812357 | -3.447650 | -1.931810 |
| 38 | 1 | 0 | -4.634716 | -2.777302 | -2.786118 |
| 39 | 1 | 0 | -5.780057 | -3.927669 | -2.072200 |
| 40 | 6 | 0 | -6.081887 | -2.364789 | -0.088828 |
| 41 | 1 | 0 | -6.342323 | -1.316557 | -0.297606 |
| 42 | 1 | 0 | -6.091898 | -2.505097 | 0.995545  |
| 43 | 1 | 0 | 3.098381  | -3.534768 | 1.240280  |
| 44 | 1 | 0 | 3.744270  | -0.483067 | -1.743448 |
| 45 | 1 | 0 | 1.143115  | -2.344063 | 2.010830  |
| 46 | 1 | 0 | -6.865290 | -2.998168 | -0.503149 |
| 47 | 1 | 0 | -4.053438 | -4.234570 | -1.957942 |
| 48 | 1 | 0 | -0.219591 | 5.388931  | -2.754091 |
| 49 | 1 | 0 | 0.764409  | 7.425626  | -0.480125 |
| 50 | 7 | 0 | 4.699054  | -2.835688 | -0.820270 |
| 51 | 6 | 0 | 5.218058  | -3.950072 | -0.046902 |
| 52 | 6 | 0 | 5.595788  | -2.189361 | -1.761588 |
| 53 | 1 | 0 | 4.464495  | -4.733994 | 0.068534  |
| 54 | 1 | 0 | 6.062462  | -4.390332 | -0.575867 |
| 55 | 1 | 0 | 5.558074  | -3.655789 | 0.956945  |
| 56 | 1 | 0 | 6.390485  | -2.882974 | -2.033494 |
| 57 | 1 | 0 | 5.072053  | -1.919289 | -2.682998 |
| 58 | 1 | 0 | 6.059791  | -1.278153 | -1.355893 |
| 59 | 6 | 0 | 0.025887  | -0.042180 | 2.558062  |
| 60 | 7 | 0 | 0.045457  | -0.055318 | 3.711501  |

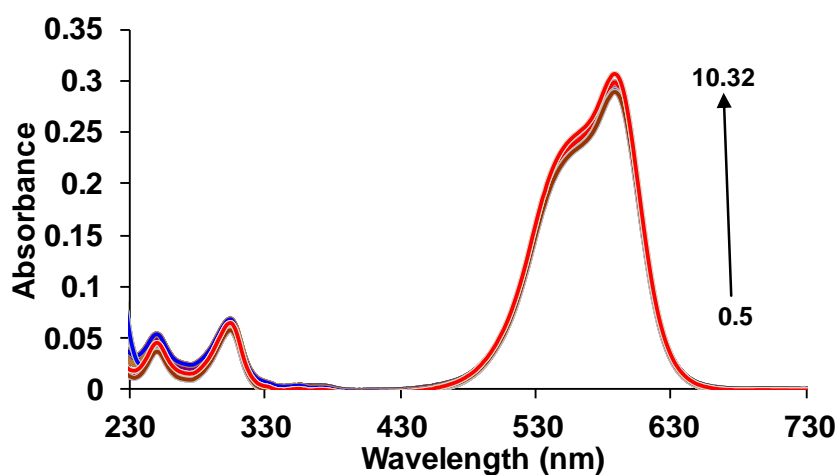

**Fig. S4.** Changes in the UV-vis spectrum of **1** upon pH titrations with HCl (0.01 and 0.1 M) and NaHCO<sub>3</sub> (0.1 and 1 M).

**Complete Reference for Gaussian (Reference 16 in manuscript)**

Gaussian 09, Revision B.01, M. J. Frisch, G. W. Trucks, H. B. Schlegel, G. E. Scuseria, M. A. Robb, J. R. Cheeseman, G. Scalmani, V. Barone, B. Mennucci, G. A. Petersson, H. Nakatsuji, M. Caricato, X. Li, H. P. Hratchian, A. F. Izmaylov, J. Bloino, G. Zheng, J. L. Sonnenberg, M. Hada, M. Ehara, K. Toyota, R. Fukuda, J. Hasegawa, M. Ishida, T. Nakajima, Y. Honda, O. Kitao, H. Nakai, T. Vreven, J. A. Montgomery Jr., J. E. Peralta, F. Ogliaro, M. Bearpark, J. J. Heyd, E. Brothers, K. N. Kudin, V. N. Staroverov, T. Keith, R. Kobayashi, J. Normand, K. Raghavachari, A. Rendell, J. C. Burant, S. S. Iyengar, J. Tomasi, M. Cossi, N. Rega, J. M. Millam, M. Klene, J. E. Knox, J. B. Cross, V. Bakken, C. Adamo, J. Jaramillo, R. Gomperts, R. E. Stratmann, O. Yazyev, A. J. Austin, R. Cammi, C. Pomelli, J. W. Ochterski, R. L. Martin, K. Morokuma, V. G. Zakrzewski, G. A. Voth, P. Salvador, J. J. Dannenberg, S. Dapprich, A. D. Daniels, O. Farkas, J. B. Foresman, J. V. Ortiz, J. Cioslowski and D. J. Fox, Gaussian, Inc., Wallingford CT, 2010.
